# Supplementary material for: Effect of pyridyl substituents leading to the formation of green luminescent mercury(ii) coordination polymers, zinc(ii) dimers and a monomer
Source: Royal Society of Chemistry journal article supplement (doi:10.1039/c4nj00435c), 2014-05-27
Supplement: c4nj00435c1.pdf [file c4nj00435c1.pdf]

## Supporting information

### Effect of pyridyl substituents on dithiocarbamates leading to the formation of green luminescent mercury(II) coordination polymers, zinc(II) dimers and a monomer

Vikram Singh,<sup>a</sup> Vinod Kumar,<sup>a</sup> Ajit N. Gupta,<sup>a</sup> Michael. G. B. Drew<sup>b</sup> and Nanhai Singh<sup>\*a</sup>

<sup>a</sup>Department of Chemistry, Faculty of Science, Banaras Hindu University

Varanasi 221005 (India)

<sup>b</sup>Department of Chemistry, The University of Reading, Whiteknights, Reading,  
RG6 6AD, U.K.

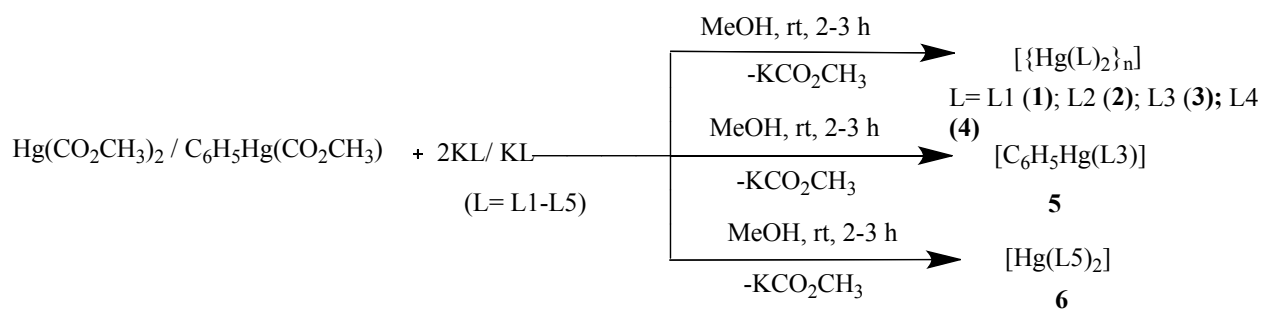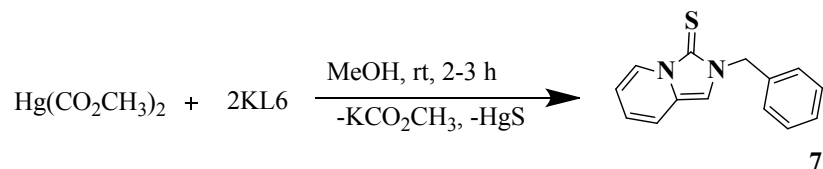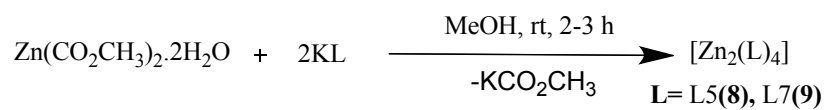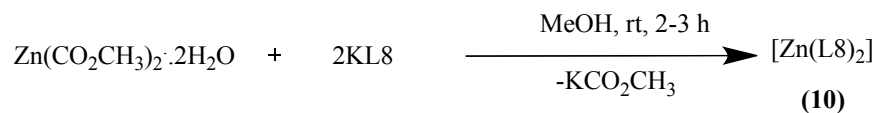

**Scheme S1.** General methodology for the synthesis of compounds (1-10).

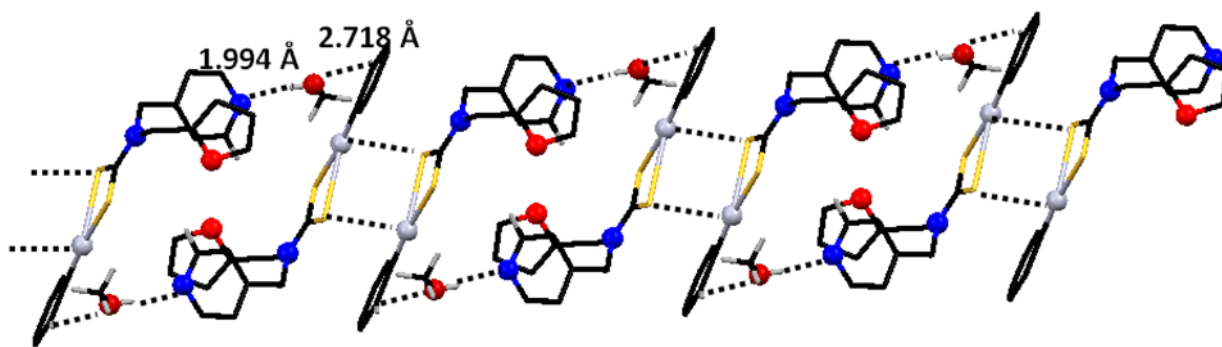

**Figure S2.** Solvate methanol stabilizing 1-D layer structure via O-H $\cdots$ N and C-H $\cdots$ O hydrogen bonding connecting Hg $\cdots$ S dimeric units in **5**.

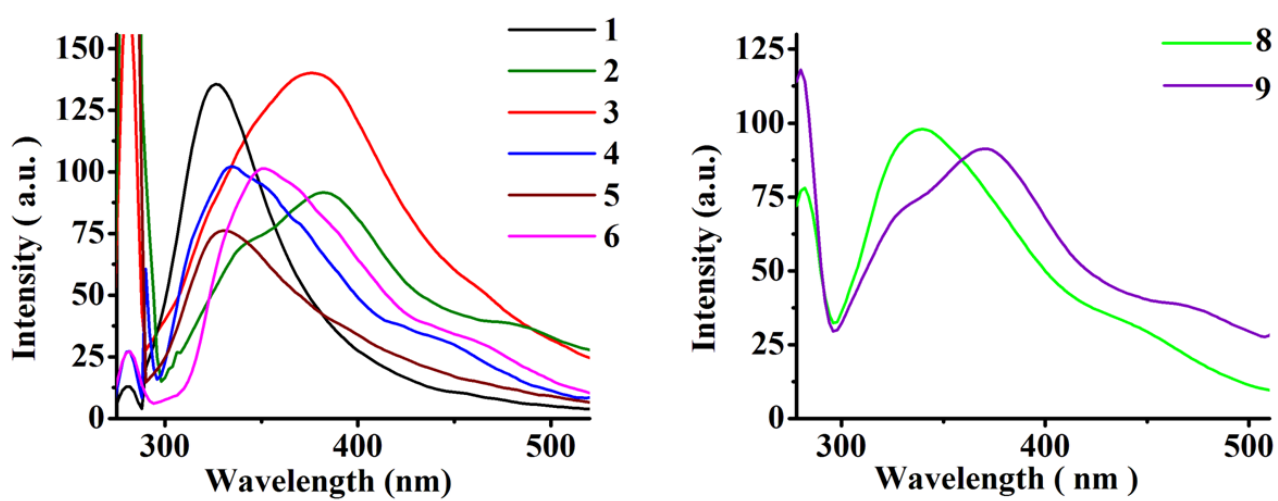

**Figure S3.** Emission spectra of the complexes in CH<sub>2</sub>Cl<sub>2</sub> solution when excited at  $\lambda_{\text{ex}}$  280 nm.

**Table S1**

Dimensions (distances, Å angles, deg) in the metal coordination spheres.

Structures **1**, **2**, **3**

|            | <b>1</b>   | <b>2</b>  | <b>3</b>  |
|------------|------------|-----------|-----------|
| Hg-S11     | 2.658(2)   | 2.507(2)  | 2.479(1)  |
| Hg-S13     | 2.513(2)   | 2.836(3)  | 2.820(1)  |
| Hg-S41     | 2.389(2)   | 2.605(2)  |           |
| Hg-S43     | 3.112(2)   | 2.657(3)  |           |
| Hg-N6*     | 2.544(7)   | 2.586(5)  | 2.646(4)  |
|            |            |           |           |
| S11-Hg-S13 | 69.89(7)   | 67.11(6)  | 67.95(4)  |
| S41-Hg-S43 | 64.46(6)   | 68.20(6)  |           |
| S11-Hg-S43 | 98.10(7)   | 116.88(7) |           |
| S13-Hg-S43 | 161.62(7)  | 172.10(6) |           |
| S11-Hg-S41 | 132.40(7)  | 167.93(7) |           |
| S13-Hg-S41 | 149.35(8)  | 106.54(6) |           |
| S11-Hg-N6* | 86.66(16)  | 92.81(13) | 89.65(12) |
| S13-Hg-N6* | 102.85(17) | 87.91(14) | 83.08(10) |
| S41-Hg-N6* | 99.64(16)  | 97.27(13) |           |
| S43-Hg-N6* | 82.47(16)  | 98.48(13) |           |

\* N6 = N66 (x, 1/2-y, z-1/2) in **1**, N65 (x,y-1,z) in **2**, N65 ( 1.5-x, y+1/2, -z-1/2) in **3**.

**Table S2**

## Structure 4

|                                     |                                      |
|-------------------------------------|--------------------------------------|
| Hg(1)-S(11) 2.410(5)                | Hg(2)-S(71) 2.432(4)                 |
| Hg(1)-S(41) 2.825(5)                | Hg(2)-S(13) 2.904(4)                 |
| Hg(1)-S(13) 3.006(5)                | Hg(2)-S(103) \$1 3.009(5)            |
| Hg(1)-S(43) 2.429(4)                | Hg(2)-S(101) \$1 2.423(5)            |
| Hg(1)-S(103) 2.916(5)               | Hg(2)-S(73) 2.828(5)                 |
|                                     |                                      |
| S(11)-Hg(1)-S(43) 167.84(17)        | S(11)-Hg(1)-S(41) 116.31(16)         |
| S(43)-Hg(1)-S(41) 68.71(14)         | S(11)-Hg(1)-S(103) 94.47(15)         |
| S(43)-Hg(1)-S(103) 95.44(15)        | S(41) – Hg(1) - S(103) 100.15(14)    |
| S(11) – Hg(1) - S(13) 65.95(15)     | S(43) – Hg(1) - S(13) 102.36(15)     |
| S(103) – Hg(1) - S(13) 126.39(12)   | S(41)-Hg(1)-S(13) 133.49(14)         |
|                                     |                                      |
| S(101)\$1- Hg(2) – S(73) 117.81(16) | S(71) – Hg(2) – S(73) 68.37(14)      |
| S(101)\$1 - Hg2- S(13) 94.15(14)    | S(71)-Hg(2)-S(13) 95.76(14)          |
| S(73)-Hg(2)-S(13) 98.34(15)         | S(101)\$1- Hg2 – S(103)\$1 65.71(13) |
| S(71) - Hg2- S(103)\$1 101.88(14)   | S(73) - Hg2 – S(103)\$1 133.13(14)   |
| S(13) - Hg2 – S(103)\$1 126.39(12)  | S(101)\$1- Hg(2) – S(71) 167.38(15)  |
| Symmetry element \$1 = 1+x,y,z      |                                      |

**Table S3**

## Structure 5

|                                   |                                  |
|-----------------------------------|----------------------------------|
| Hg(1) - C(41) 2.127(14)           | Hg(1)- S(11) 2.389(4)            |
| Hg(1)- S(13) 3.020(5)             | Hg(1) - S(13)\$1 3.191(4)        |
| Hg(1) - O(1) 3.26(2)              | C(41)- Hg(1)- S(11) 174.2(4)     |
| C(41)- Hg(1)- S(13) 115.7(4)      | C(41) - Hg(1) - S(13)\$1 92.1(4) |
| C(41) - Hg(1) - O(1) 95.0(5)      | S(11)- Hg(1)- S(13) 66.1(1)      |
| S(11) - Hg(1) - S(13)\$1 92.9(2)  | S(11) - Hg(1) - O(1) 81.5(3)     |
| S(13) - Hg(1) - S(13)\$1 102.3(1) | S(13) - Hg(1) - O(1) 143.1(3)    |
| S(13)\$1-Hg(1) - O(1)\$1 96.2(3)  |                                  |

\$1 Symmetry element \$1 1-x, -y, -z

**Table S4**

## Structure 6

|                               |                                  |
|-------------------------------|----------------------------------|
| Hg(1) - S(11) 2.399(2)        | S(11) - Hg(1) - S(13) 66.9(1)    |
| Hg(1) - S(13) 2.952(2)        | S(11) - Hg(1) - S(13)\$1 89.5(1) |
| Hg(1) - S(13)\$1 3.218(2)     | S(13) - Hg(1) - S(13)\$1 83.2(1) |
| \$1 Symmetry element x,-1+y,z |                                  |

**Table S5**  
Structure 8

|                                    |                                   |
|------------------------------------|-----------------------------------|
| Zn(1)- N(37)\$1 2.080(5)           | Zn(1)- S(13 ) 2.404(2)            |
| Zn(1)- S(11) 2.504(2)              | Zn(1)- S(43) 2.521(2)             |
| Zn(1)-S(41) 2.420(2)               |                                   |
| N(37)\$1- Zn(1)- S(13) 107.06(17)  | N(37)\$1- Zn(1)- S(41) 110.07(18) |
| S(13) - Zn(1)- S(41) 142.87(8)     | N(37)\$1- Zn(1)- S(11) 104.18(16) |
| S(13) - Zn(1)- S(11) 73.25(7)      | S(41) - Zn(1)- S(11) 97.91(8)     |
| N(37)\$1- Zn(1)- S(43) 101.17(17)  | S(13) - Zn(1)- S(43) 99.81(8)     |
| S(41) - Zn(1)- S(43) 72.61(8)      | S(11) - Zn(1)- S(43) 154.65(7)    |
| \$1 Symmetry element 1-x, 1-y, 1-z |                                   |

**Table S6**  
Structure 9

|                                    |                                |
|------------------------------------|--------------------------------|
| Zn(1)- S(13) 2.340(1)              | Zn(1)- S(41) 2.340(1)          |
| Zn(1)- S(43)\$1 2.375(1)           | Zn(1)- S(11) 2.448(1)          |
| Zn(1)- S(43) 2.814(1)              | S(13)- Zn(1)-S(41) 134.3(1)    |
| S(13)- Zn(1)-S(43)\$1 117.9(1)     | S(41)- Zn(1)-S(43)\$1 104.8(1) |
| S(13)- Zn(1)-S(11) 75.8(1)         | S(41)- Zn(1)-S(11)107.1(1)     |
| S(11)- Zn(1)-S(43)\$1 107.6(1)     | S(13)- Zn(1)-S(43) 95.5(1)     |
| S(41)- Zn(1)-S(43) 69.3(1)         | S(43)- Zn(1)-S(43)\$1 88.2(1)  |
| S(11)- Zn(1)-S(43) 164.1(1)        |                                |
| \$1 Symmetry element 1-x, 1-y, 1-z |                                |

**Table S7**  
Structure **10**

|                             |                             |
|-----------------------------|-----------------------------|
| Zn(1)- S(11) 2.334(2)       | Zn(1)- S(41) 2.337(2)       |
| Zn(1)- S(13) 2.350(2)       | Zn(1)- S(43) 2.366(2)       |
| S(11)- Zn1 - S(41) 129.7(1) | S(11)- Zn1 - S(13) 77.7(1)  |
| S(41)- Zn1 - S(13) 123.1(1) | S(11)- Zn1 - S(43) 127.3(1) |
| S(41)- Zn1 - S(43) 77.5(1)  | S(13)- Zn1 - S(43) 129.6(1) |

**Table S8.** Solvent assisted hydrogen bonding parameters in structures **5** and **8**.

|          | D-H...A             | D-H/<br>Å | H...A/Å | D...A/Å | D-H...A/° | Symmetry<br>elements |
|----------|---------------------|-----------|---------|---------|-----------|----------------------|
| <b>5</b> | C(31)-H(31B)...O(1) | 0.96      | 2.72    | 3.65(1) | 161       | x, 1+y, z            |
|          | O(1)-H(1)...N(35)   | 0.82      | 2.01    | 2.81(1) | 165       | 1-x, 2-y, -z         |
| <b>8</b> | C(64)-H(64)...O(91) | 0.93      | 2.38    | 3.21(1) | 149       |                      |



**Table S9.** Photophysical data of the complexes **1-9**.

| complexes | $\lambda_{\max}$<br>excitation<br>(nm) | $\lambda_{\max}$<br>emission<br>(Solution)<br>nm | $\lambda_{\max}$<br>emission<br>(Solid) nm | Quantum<br>yield<br>$\Phi$ | Stoke's Shift (cm <sup>-1</sup> ) |       |
|-----------|----------------------------------------|--------------------------------------------------|--------------------------------------------|----------------------------|-----------------------------------|-------|
|           |                                        |                                                  |                                            |                            | Solution                          | Solid |
| <b>1</b>  | 283                                    | 326                                              | 455                                        | 0.120                      | 4660                              | 13360 |
| <b>2</b>  | 257                                    | 369                                              | 424                                        | 0.142                      | 11810                             | 15325 |
| <b>3</b>  | 255                                    | 377                                              | 470                                        | 0.173                      | 12690                             | 17939 |
| <b>4</b>  | 256                                    | 334                                              | 354                                        | 0.132                      | 9122                              | 10813 |
| <b>5</b>  | 266                                    | 330                                              | 384                                        | 0.119                      | 7290                              | 11552 |
| <b>6</b>  | 259                                    | 342                                              | 355                                        | 0.131                      | 9370                              | 10441 |
| <b>8</b>  | 266                                    | 338                                              | 363                                        | 0.139                      | 8008                              | 10045 |
| <b>9</b>  | 266                                    | 366                                              | 397                                        | 0.141                      | 10271                             | 12405 |

Solution Quantum yield of the complexes were recorded as pyridyl-2-amine (0.1 M H<sub>2</sub>SO<sub>4</sub>, quantum yield 0.6) as reference.

## Synthesis of Complexes

[Hg(L)<sub>2</sub>] [L = L1 (1), L2 (2), L3 (3), L4 (4), L5, 6]

To a 10 mL methanolic solution of KL1 (0.356 g, 1 mmol), KL2 (0.236 g, 1 mmol), KL3 (0.302 g, 1 mmol), or KL4 (0.326 g, 1 mmol) was added slowly a (5 mL) solution of Hg(CO<sub>2</sub>CH<sub>3</sub>)<sub>2</sub> (0.159 g, 0.5 mmol) in the same solvent mixture. The reaction mixture was allowed to stir for 2 h yielding yellow to yellowish coloured precipitate. In each case the solid product thus formed was filtered off washed with methanol followed by diethylether. The compound was recrystallized in dichloromethane-methanol (70:30) solvent mixture. Yellowish crystals were obtained.

[C<sub>6</sub>H<sub>5</sub>Hg(L3)] (5)

The orange compound **5** was synthesized and isolated adopting the method described for **1-6**, but using KL3 (0.302 g, 1 mmol) and C<sub>6</sub>H<sub>5</sub>Hg(CO<sub>2</sub>CH<sub>3</sub>)<sub>2</sub> (0.337 g, 1 mmol). Yellowish crystals were obtained.

**2-Benzyl-2H-imidazo[1,5-a] pyridine-3-thione (C<sub>14</sub>H<sub>12</sub>N<sub>2</sub>S) (7)**

To a 5 mL methanolic solution of the ligand KL6, Potassium benzyl(pyridin-2-ylmethyl) dithiocarbamate (0.312 g, 1 mmol) was added slowly a 5 mL solution of the Hg(CO<sub>2</sub>CH<sub>3</sub>)<sub>2</sub> (0.159 g, 0.5 mmol) in the same solvent. The reaction mixture was stirred which produced the light blue solution along with the formation of black HgS, which was filtered off and the filtrate was kept for crystallization in methanol-dichloromethane mixture (1:1). Light blue coloured crystals were obtained.

## Characterization details

(1) Yellow green solid, yield: 0.303 g, 72%. m.p. 180-184 °C. Elemental analysis calcd (%) for C<sub>30</sub>H<sub>26</sub>O<sub>4</sub>N<sub>4</sub>S<sub>4</sub>Hg: C 43.13, H 3.13, N 6.70; found(%): C 42.85, H 3.18, N 6.42. <sup>1</sup>H NMR (300.40 MHz, CDCl<sub>3</sub>, ppm): δ 8.60-8.51 (m, 4H, -C<sub>5</sub>H<sub>4</sub>N), 7.36-7.32 (m, 4H, C<sub>5</sub>H<sub>4</sub>N), 6.82-6.74 (s, 6H, C<sub>6</sub>H<sub>3</sub>CH<sub>2</sub>O<sub>2</sub>), 5.99 (s, 4H, -CH<sub>2</sub>C<sub>6</sub>H<sub>3</sub>O<sub>2</sub>), 5.01-4.91 (s, 4H, -CH<sub>2</sub>C<sub>6</sub>H<sub>3</sub>CH<sub>2</sub>O<sub>2</sub>, -CH<sub>2</sub>C<sub>5</sub>H<sub>4</sub>N), <sup>13</sup>C{<sup>1</sup>H} NMR (75.45 MHz, CDCl<sub>3</sub>, ppm): δ 206.7 (CS<sub>2</sub>), 149.12, 149.05, 148.97 (NC<sub>5</sub>H<sub>4</sub>), 135.07, 129.95, 127.30, 123.30, 121.15 (-C<sub>6</sub>H<sub>3</sub>CH<sub>2</sub>O<sub>2</sub>), 107.97 (-CH<sub>2</sub>C<sub>6</sub>H<sub>3</sub>CH<sub>2</sub>O<sub>2</sub>), 58.12 (-CH<sub>2</sub>C<sub>5</sub>H<sub>4</sub>N), 54.66 (-CH<sub>2</sub>C<sub>7</sub>H<sub>5</sub>O<sub>2</sub>). IR (KBr, cm<sup>-1</sup>): 1370 ν(C=N), 1039, 972 ν(C-S). UV-vis.( CH<sub>2</sub>Cl<sub>2</sub>, λ<sub>max</sub>, nm, 10<sup>4</sup> ε/ M<sup>-1</sup>cm<sup>-1</sup>): 283 (1.63).

(2) Yellow solid, yield: 0.225 g, 76 %. m.p. 170-174 °C. Elemental analysis calcd (%) for  $C_{16}H_{18}N_4S_4Hg$ : C 32.29, H 3.05, N 9.42; found(%): C 32.15, H 2.94, N 9.37.  $^1H$  NMR (300.40 MHz,  $CDCl_3$ , ppm):  $\delta$  8.63-8.57 (s, 4H,  $C_5H_4N$ ), 7.25 (s, 3H,  $C_5H_4N$ ), 5.07 (s, 2H,  $-CH_2C_5H_4N$ ), 3.39 (s, 6H,  $-CH_3$ ),  $^{13}C\{^1H\}$  NMR (75.45 MHz,  $CDCl_3$ , ppm):  $\delta$  205.7 ( $CS_2$ ), 149.8, 149.3 ( $NC_5H_4$ ), 58.0 ( $-CH_2C_5H_4N$ ), 52.0 ( $-CH_3$ ). IR (KBr,  $cm^{-1}$ ): 1390  $\nu(C=N)$ , 1026, 969  $\nu(C-S)$ . UV-vis. ( $CH_2Cl_2$ ,  $\lambda_{max}$ , nm,  $10^4 \epsilon / M^{-1}cm^{-1}$ ): 275 (1.12), 258 (1.42).

(3) Yellow solid, yield: 0.295 g, 81%. m.p. 182-186 °C. Elemental analysis calcd (%) for  $C_{24}H_{22}N_4O_2S_4Hg$ : C 39.63, H 3.05, N 7.70; found(%): C 39.52, H 2.94, N 7.55.  $^1H$  NMR (300.40 MHz,  $CDCl_3$ , ppm):  $\delta$  8.63-8.59 (s, 4H,  $C_5H_4N$ ), 7.85-7.25 (s, 4H,  $C_5H_4N$ ), 7.41 (d, 2H,  $C_4H_3O$ ), 6.30 (m, 4H,  $C_4H_3O$ ), 5.29-5.08 (s, 2H,  $-CH_2C_5H_4N$ ,  $-CH_2C_4H_3O$ ),  $^{13}C\{^1H\}$  NMR (75.45 MHz,  $CDCl_3$ , ppm):  $\delta$  202.1 ( $CS_2$ ), 149.6, 149.5 ( $NC_5H_4$ ), 141.4 ( $-C_4H_3O$ ), 137.6, 137.0, 134.4 ( $C_5H_4N$ ), 129.0, 128.8, 128.7, 128.5, 128.4, 128.3, 127.8, 122.2 ( $-C_6H_5$ ), 56.0 ( $-CH_2C_5H_4N$ ), 54.0 ( $-CH_2C_4H_3O$ ). IR (KBr,  $cm^{-1}$ ): 1415  $\nu(C=N)$ , 1065, 932,  $\nu(C-S)$ . UV-vis. ( $CH_2Cl_2$ ,  $\lambda_{max}$ , nm,  $10^4 \epsilon / M^{-1}cm^{-1}$ ): 280(1.06), 252(1.42).

(4) Light yellow solid yield: 0.290 g, 76 %. m.p. 194-198 °C. Elemental analysis calcd (%) for  $C_{30}H_{30}N_4S_4Hg$ : C 46.46, H 3.89, N 7.52; found(%): C 46.28, H 3.84, N 7.95.  $^1H$  NMR (300.40 MHz,  $CDCl_3$ , ppm):  $\delta$  8.59-8.50 (d, 4H,  $C_5H_4N$ ), 7.81-7.78 (m, 4H,  $C_5H_4N$ ), 7.19 (m, 10H,  $-C_6H_5$ ), 5.26 (s, 4H,  $-CH_2C_4H_3O$ ), 4.90 (s, 4H,  $-CH_2C_5H_4N$ ), 3.92-3.87, 3.14-3.09 (t, t,  $-CH_2-CH_2-C_6H_5$ ).  $^{13}C\{^1H\}$  NMR (75.45 MHz,  $CDCl_3$ , ppm):  $\delta$  206.57 ( $CS_2$ ), 149.80-149.08 ( $-C_5H_4N$ ), 137.63-135.45 ( $-C_5H_4N$ ), 137.63-123.79 ( $-C_6H_5$ ), 57.59 ( $-CH_2C_5H_4N$ ), 58.4-58.1 ( $-CH_2CH_2C_6H_5$ ). IR (KBr,  $cm^{-1}$ ): 1422  $\nu(C=N)$ , 1084, 1026  $\nu(C-S)$ . UV-vis. ( $CH_2Cl_2$ ,  $\lambda_{max}$ , nm,  $10^4 \epsilon / M^{-1}cm^{-1}$ ): 290(1.18), 251(1.41).

(5) Orange solid, yield: 0.225 g, 83 %. m.p. 162-166 °C. Elemental analysis calcd (%) for  $C_{18}H_{16}N_2OS_2Hg$ : C 39.96, H 2.98, N 5.18; found(%): C 39.82, H 2.86, N 5.08;  $^1H$  NMR (300.40 MHz,  $CDCl_3$ , ppm):  $\delta$  8.63-8.57 (s, 4H,  $C_5H_4N$ ), 7.85-7.67 (s, 4H,  $C_5H_4N$ ), 7.41 (m, 10H,  $-C_6H_5$ ), 6.30 (m, 6H,  $C_4H_3O$ ), 5.27 (s, 4H,  $-CH_2C_5H_4N$ ), 5.07 ( $-CH_2C_4H_3O$ ). 2.35( $-CH_3$ ), 3.51( $-CH_3OH$ ).  $^{13}C\{^1H\}$  NMR (75.45 MHz,  $CDCl_3$ , ppm):  $\delta$  204.1 ( $CS_2$ ), 149.73, 149.08, ( $NC_5H_4$ ), 141.4 ( $-C_4H_3O$ ), 137.6, 137.0,

134.4 (C<sub>5</sub>H<sub>4</sub>N), 129.0, 128.8, 128.7, 128.5, 128.4, 128.3, 127.8, 122.2 (-C<sub>6</sub>H<sub>5</sub>), 56.0, 54.0 (-CH<sub>2</sub>C<sub>5</sub>H<sub>4</sub>N, -CH<sub>2</sub>C<sub>4</sub>H<sub>3</sub>O). IR (KBr, cm<sup>-1</sup>): 1419 ν(C=N), 1064, 956 ν(C-S), 460 ν(C-Hg). UV-vis.(CH<sub>2</sub>Cl<sub>2</sub>, λ<sub>max</sub>, nm, 10<sup>4</sup> ε/ M<sup>-1</sup>cm<sup>-1</sup>): 280(1.41), 266(1.64).

(6) Yellow solid, Yield: 0.298 g, 80 % yield, m.p. 140-142 °C. Elemental analysis calc(%) for C<sub>28</sub>H<sub>26</sub>N<sub>4</sub>S<sub>4</sub>Hg: C, 45.00 ; H, 3.51; N, 7.50; found(%): C, 44.88; H, 3.38; N, 7.37; <sup>1</sup>H NMR(300.40 MHz, CDCl<sub>3</sub>, ppm): δ 8.32 (m, 4H, C<sub>5</sub>H<sub>5</sub>N), δ 7.27-7.16 (m, 10 H, -C<sub>6</sub>H<sub>5</sub>), δ 7.36 (m, 4H, C<sub>5</sub>H<sub>4</sub>N), δ 5.09 (s, 4H, -CH<sub>2</sub>Ar), δ 5.02 (s, 4H, -CH<sub>2</sub>C<sub>6</sub>H<sub>5</sub>). <sup>13</sup>C NMR (75.45 MHz CDCl<sub>3</sub>): δ 205.60 (CS<sub>2</sub>), 149.56, 142.32, 136.23, 135.38 (NC<sub>5</sub>H<sub>4</sub>), 127.45, 126.32, 124.65, 122.09 (-C<sub>6</sub>H<sub>5</sub>), 59.67 (-CH<sub>2</sub>C<sub>5</sub>H<sub>4</sub>N), 57.69 (-CH<sub>2</sub>Ar). IR (KBr, cm<sup>-1</sup>): 1420 ν(C=N), 1028 and 1076 ν(C-S). λ<sub>max</sub>, nm, 10<sup>4</sup> ε/ M<sup>-1</sup>cm<sup>-1</sup>): 301(1.04), 258 (1.51).

(7) Light bluish solid, Yield: 0.199 g, 82 %. m.p. 172-174 °C. Elemental analysis calc(%) for C<sub>14</sub>H<sub>12</sub>N<sub>2</sub>S: C, 69.98; H, 5.04; N, 11.67; found(%): C, 69.85; H, 4.95; N, 11.75. <sup>1</sup>H NMR (300.40 MHz, CDCl<sub>3</sub>, ppm): δ 8.33 (d, <sup>1</sup>H, C<sub>5</sub>H<sub>4</sub>N), δ 7.35-7.25 (m, 3H, -C<sub>6</sub>H<sub>5</sub>), 7.36 (m, 4H, C<sub>5</sub>H<sub>4</sub>N), 5.52 (s, 2H, -CH<sub>2</sub>Ar). <sup>13</sup>C {<sup>1</sup>H} NMR (75.45 MHz, CDCl<sub>3</sub>): δ 205.60 (CS<sub>2</sub>), 149.56, 142.32, 136.23, 135.38 (NC<sub>5</sub>H<sub>4</sub>), 127.45, 126.32, 124.65, 122.09 (-C<sub>6</sub>H<sub>5</sub>), δ 57.69 (-CH<sub>2</sub>Ar). IR (KBr, cm<sup>-1</sup>): 1420 ν(C=N), 1028 and 1076 ν(C-S),

[Zn(L)<sub>2</sub>], [L = L5 (8), L7 (9), L8 (10)]

To a 10 mL stirred methanolic solution of the ligand KL5 (0.315 g, 1 mmol), KL7 (0.256 g, 1 mmol), or KL8 (0.314 g, 1 mmol) was added separately a 5 mL solution of Zn(CO<sub>2</sub>CH<sub>3</sub>)<sub>2</sub>·2H<sub>2</sub>O (0.110 g, 0.05 mmol) in the same solvent. The reaction mixture was stirred for 6 h yielding white precipitate. In each case the solid product thus formed was washed thrice with methanol and diethylether. The compound was recrystallized in dichloromethane/ ethanol (70:30, v/v) mixture.

(8) Pale yellow solid, yield: 0.256 g, 83 %. m.p. 180-184 °C. Elemental analysis calcd (%) for C<sub>56</sub>H<sub>52</sub>N<sub>8</sub>S<sub>8</sub>Zn<sub>2</sub>: C 55.04, H 4.30, N 9.18; found(%): C 54.92, H 4.18, N 9.08. <sup>1</sup>H NMR (300.40 MHz,

CDCl<sub>3</sub>, ppm):  $\delta$  8.92-8.84 (d, 4H, C<sub>5</sub>H<sub>4</sub>N), 7.79-7.42 (m, 4H, C<sub>5</sub>H<sub>4</sub>N), 7.25-6.77 (m, 10H, -C<sub>6</sub>H<sub>5</sub>), 5.26 (s, 4H, -CH<sub>2</sub>C<sub>5</sub>H<sub>4</sub>N), 5.13 (s, 4H, -CH<sub>2</sub>C<sub>6</sub>H<sub>5</sub>). <sup>13</sup>C{<sup>1</sup>H} NMR (75.45 MHz, CDCl<sub>3</sub>, ppm):  $\delta$  204.12 (CS<sub>2</sub>), 148.63-147.51 (-C<sub>5</sub>H<sub>4</sub>N), 137.40 (-C<sub>5</sub>H<sub>4</sub>N), 121.89 (-C<sub>6</sub>H<sub>5</sub>), 56.79 (-CH<sub>2</sub>C<sub>5</sub>H<sub>4</sub>N), 43.87 (-CH<sub>2</sub>C<sub>6</sub>H<sub>5</sub>); IR (KBr, cm<sup>-1</sup>): 1432  $\nu$ (C=N), 1049, 940  $\nu$ (C-S); UV-vis. (CH<sub>2</sub>Cl<sub>2</sub>,  $\lambda_{\max}$ , nm, 10<sup>4</sup>  $\epsilon$ / M<sup>-1</sup>cm<sup>-1</sup>): 285(1.18), 266(1.37).

**(9)** White solid, yield: 0.213 g, 84 %, m.p. 165-170 °C. Elemental analysis calcd (%) for C<sub>36</sub>H<sub>56</sub>N<sub>4</sub>S<sub>8</sub>O<sub>8</sub>Zn<sub>2</sub>: C 40.91, H 5.32, N 5.29; found(%): C 40.8, H 5.24, N 5.12. <sup>1</sup>H NMR (300.40 MHz, CDCl<sub>3</sub>, ppm):  $\delta$  1.29-1.24 (t, 6H, CH<sub>3</sub>), 1.90-1.82 (m, 2H, -CH-(CH<sub>2</sub>)<sub>4</sub>N). <sup>13</sup>C{<sup>1</sup>H} NMR (75.45 MHz, CDCl<sub>3</sub>, ppm):  $\delta$  202.32 (CS<sub>2</sub>), 65.13, 70.12 (-CH<sub>2</sub>), 55 (-OCH<sub>2</sub>), 35 (-CH<sub>3</sub>). IR (KBr, cm<sup>-1</sup>): 1435  $\nu$ (C=N), 1067-945  $\nu$ (C-S). UV-vis.(CH<sub>2</sub>Cl<sub>2</sub>,  $\lambda_{\max}$ , nm, 10<sup>4</sup>  $\epsilon$ / M<sup>-1</sup>cm<sup>-1</sup>): 266(1.54).

**(10)** White solid, yield: 0.240 g, 77 %, m.p. 142-146 °C. Elemental analysis calcd (%) for C<sub>28</sub>H<sub>30</sub>N<sub>4</sub>S<sub>4</sub>Zn: C 54.58, H 4.91, N 9.09; found(%): C 54.47, H 4.84, N 9.17. <sup>1</sup>H NMR (300.40 MHz, CDCl<sub>3</sub>, ppm):  $\delta$  7.39-7.29 (m, 10H, C<sub>6</sub>H<sub>5</sub>), 6.08-6.07 (m, 6H, -C<sub>4</sub>H<sub>3</sub>NCH<sub>3</sub>), 5.29 (s, 4H-CH<sub>2</sub>C<sub>4</sub>H<sub>3</sub>NCH<sub>3</sub>), 5.03 (s, 4H, -CH<sub>2</sub>C<sub>6</sub>H<sub>5</sub>), 3.61 (s, 6H, -CH<sub>3</sub>C<sub>4</sub>H<sub>3</sub>N), <sup>13</sup>C NMR (300.40 MHz, CDCl<sub>3</sub>, ppm):  $\delta$  205.1 (CS<sub>2</sub>), 134.7-124.2 (C<sub>6</sub>H<sub>5</sub>), 111.8-107.4 (C<sub>4</sub>H<sub>3</sub>NCH<sub>3</sub>), 54.2 (-CH<sub>2</sub>C<sub>6</sub>H<sub>5</sub>), 48.4 (-CH<sub>2</sub>C<sub>4</sub>H<sub>3</sub>NCH<sub>3</sub>), IR (KBr, cm<sup>-1</sup>): 1430  $\nu$ (C=N), 1072, 978  $\nu$ (C-S). UV-vis.(CH<sub>2</sub>Cl<sub>2</sub>,  $\lambda_{\max}$ , nm, 10<sup>4</sup>  $\epsilon$ / M<sup>-1</sup>cm<sup>-1</sup>): 285(1.45).

**Figure S4.** IR Spectra of complexes and their corresponding Ligands.

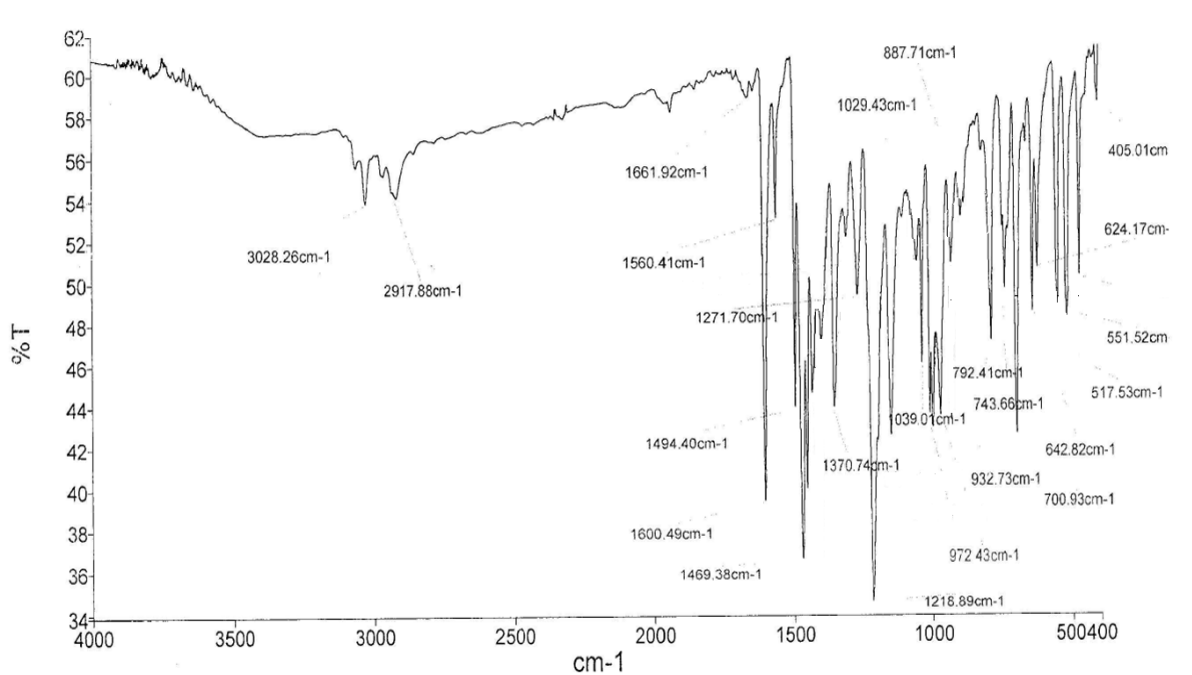

**IR Spectra of Complex 1**

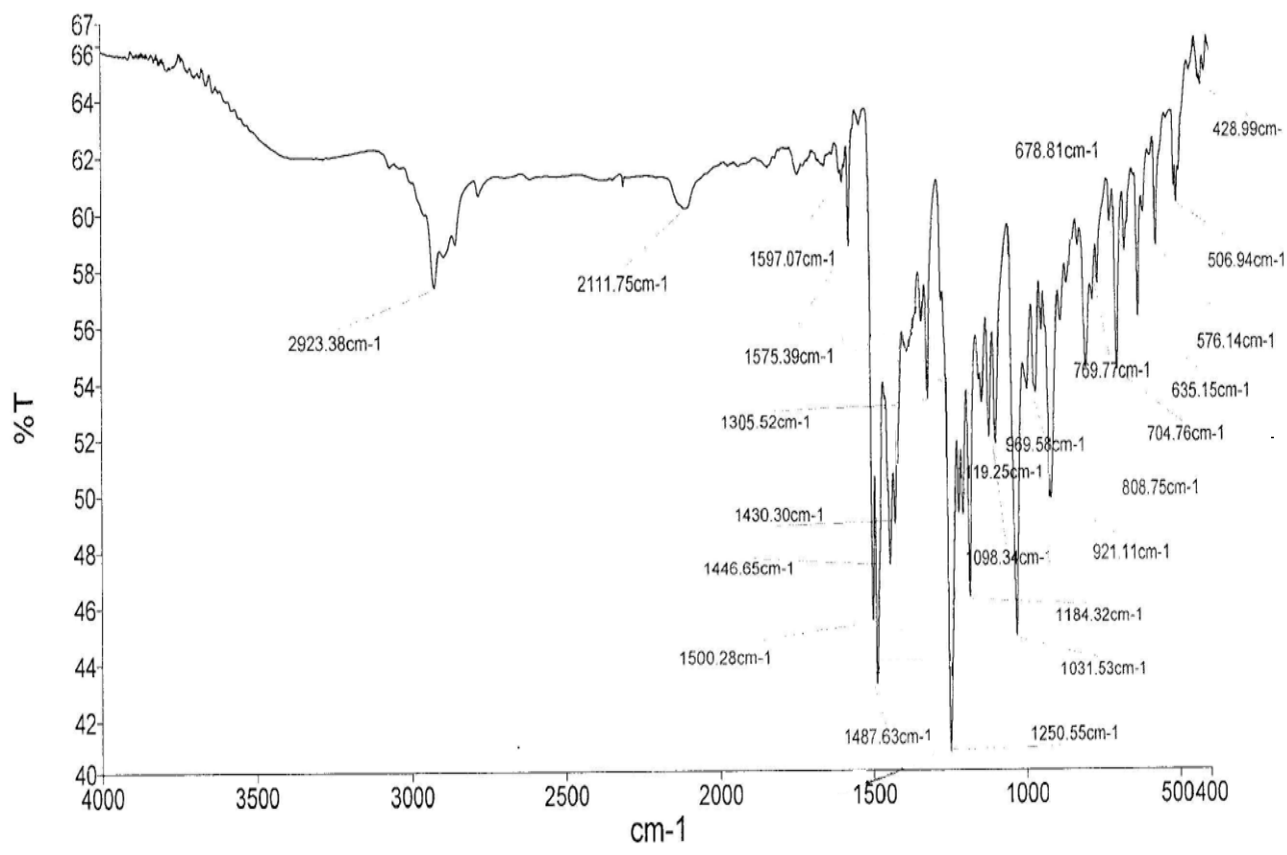

**IR Spectra of KL1**

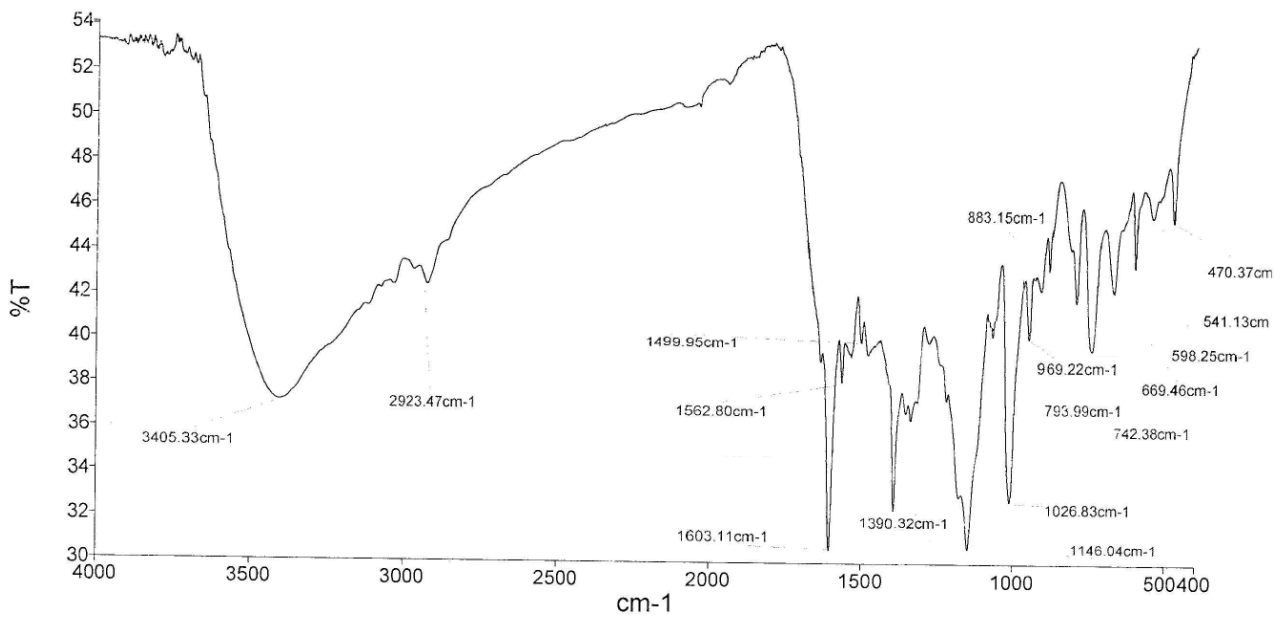

IR Spectra of 2

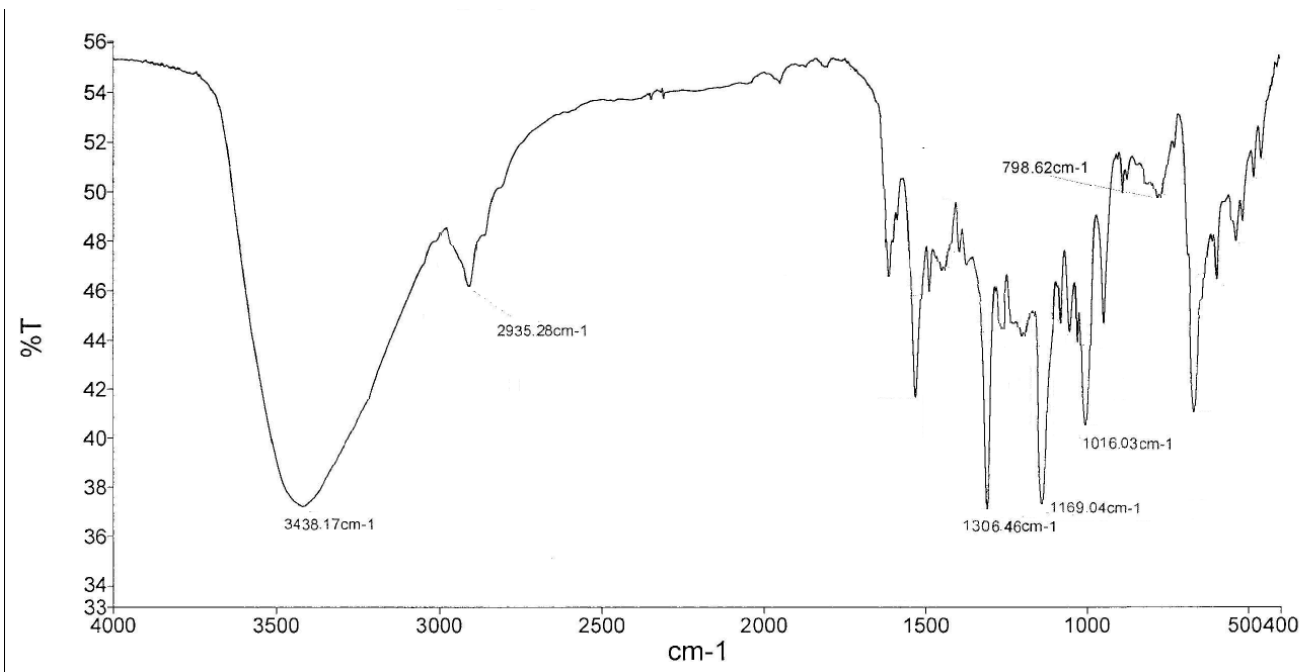

IR Spectra of KL2

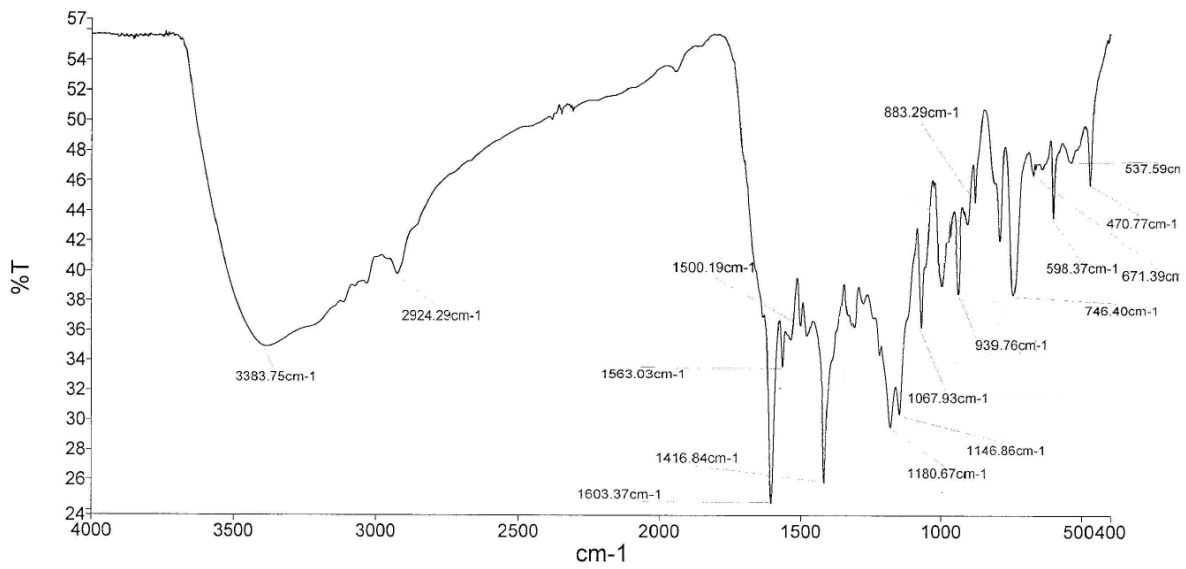

IR Spectra of **3**

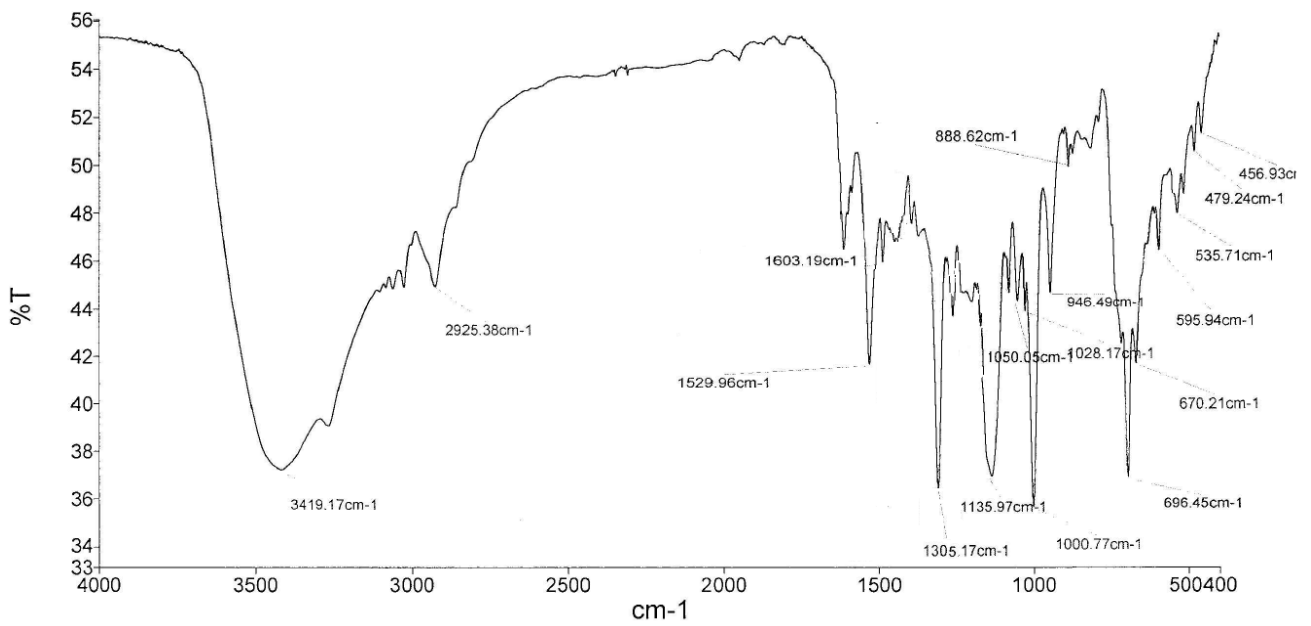

IR Spectra of **KL3**



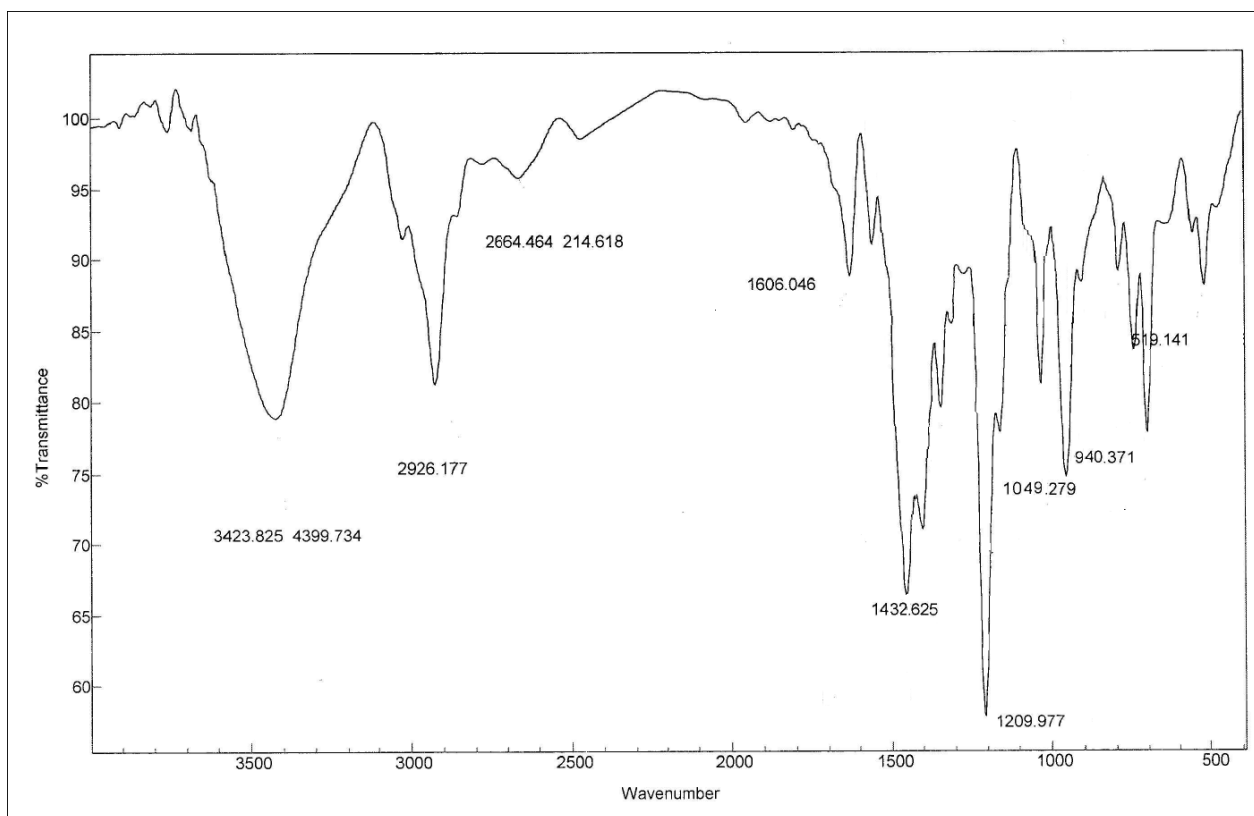

IR Spectra of **8**

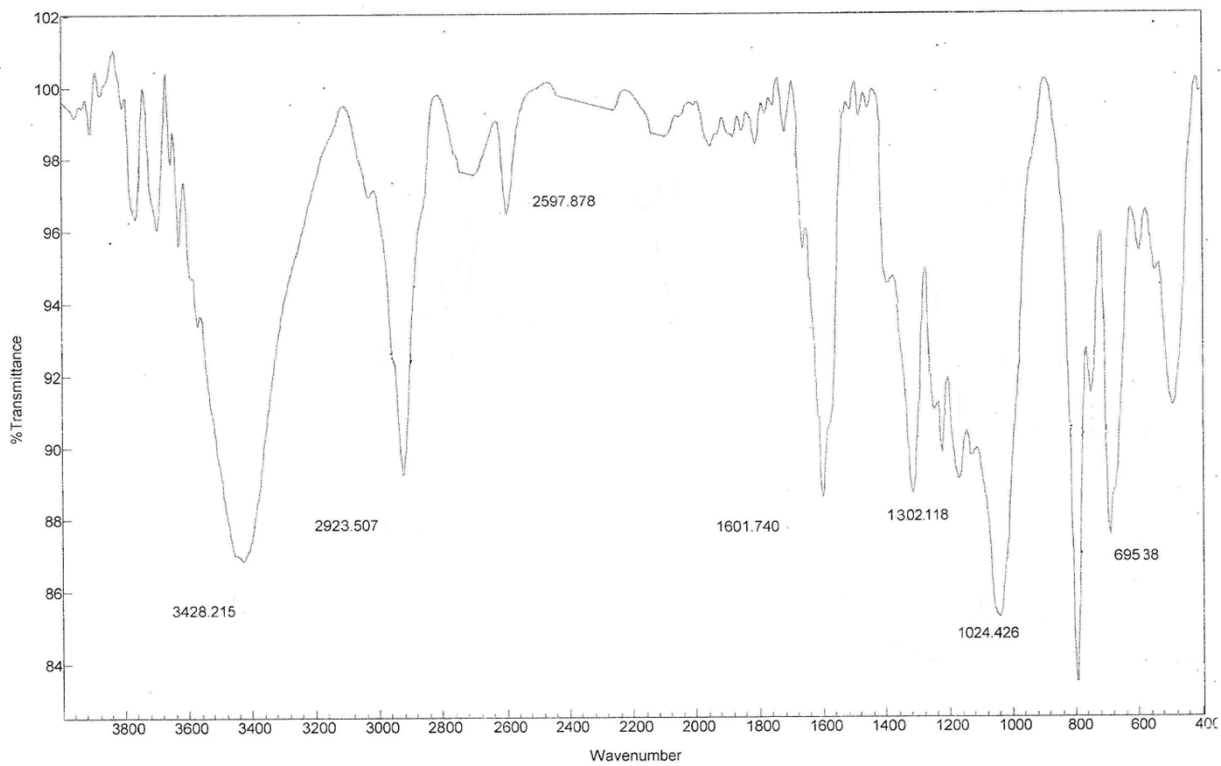

IR Spectra of **KL5**

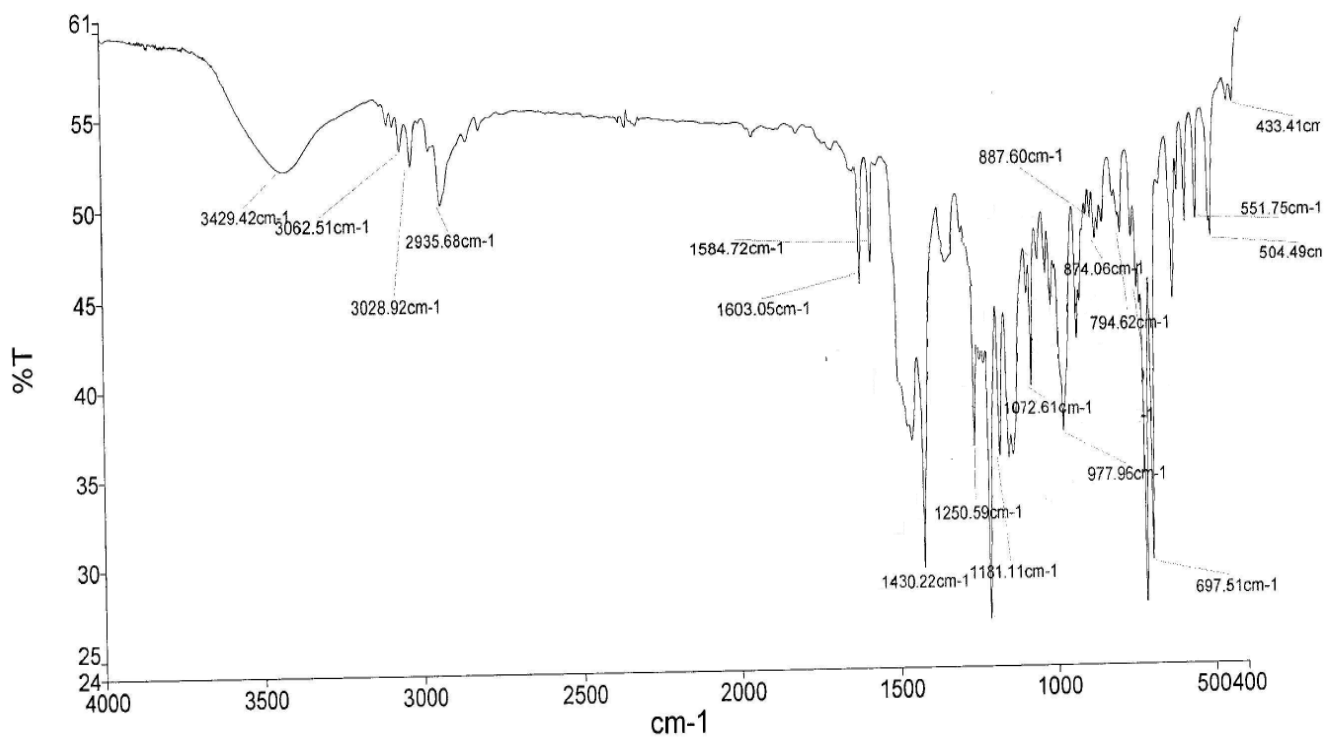

IR Spectra of **10**

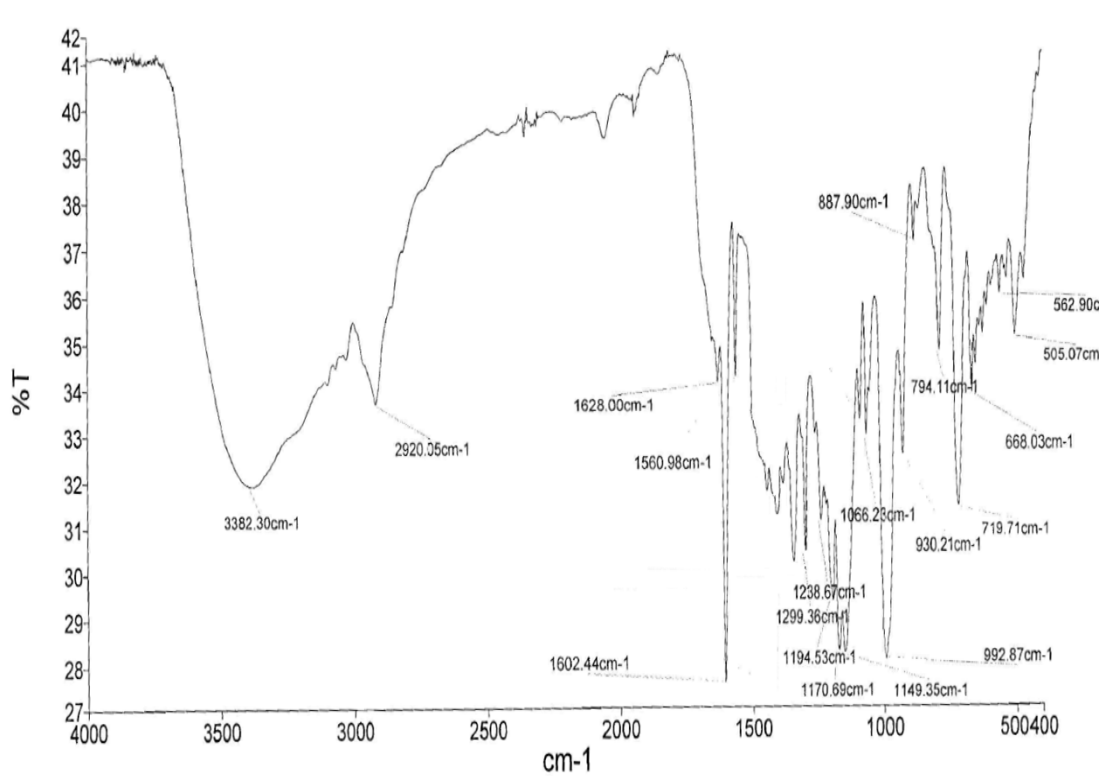

IR Spectra of **KL8**
